# Supplementary material for: Influenza virus infection expands the breadth of antibody responses through IL-4 signalling in B cells
Source: PubMed Central journal article supplement (PMC8213721; doi:10.1038/s41467-021-24090-z), 2021-06-18
Supplement: 41467_2021_24090_MOESM1_ESM.pdf [file 41467_2021_24090_MOESM1_ESM.pdf]

# Supplementary Fig. 1

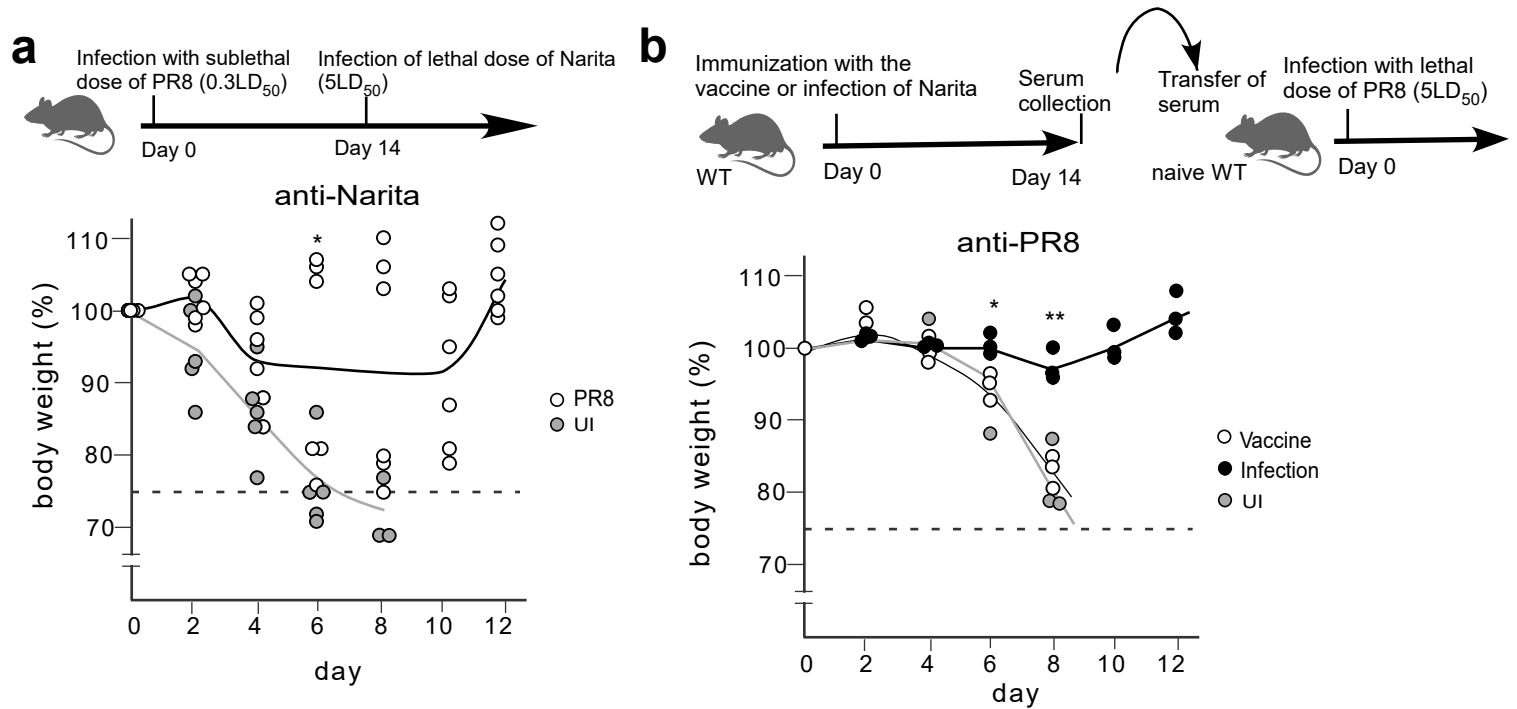

## Supplementary Fig. 1 Protection against heterotypic virus infection

**a**, Unimmunized (UI) mice (gray dots,  $n=4$ ) and mice immunized by intranasal infection (white dots) with A/PR/8/1934 ( $n=6$ ) were challenged intranasally with a lethal dose of A/Narita/1/2009. The body weight change of mice was monitored until 12 days post-infection. **b**, Mice immunized by the inactivated vaccine (vaccine  $n=3$  (white dots)) or the intranasal infection (infection  $n=3$  (black dots)) of A/Narita/1/2009 were challenged intranasally with a lethal dose of A/PR/8/1934. The body weight change of mice was monitored until 12 days post-infection. Missing symbols mean that the mice were euthanized, as described in Fig.1. \* $p<0.05$ , \*\* $p<0.01$  by unpaired, two-tailed  $t$ -test (UI group with PR8 group in **a**, Vaccine group with Infection group in **b**).

## Supplementary Fig. 2

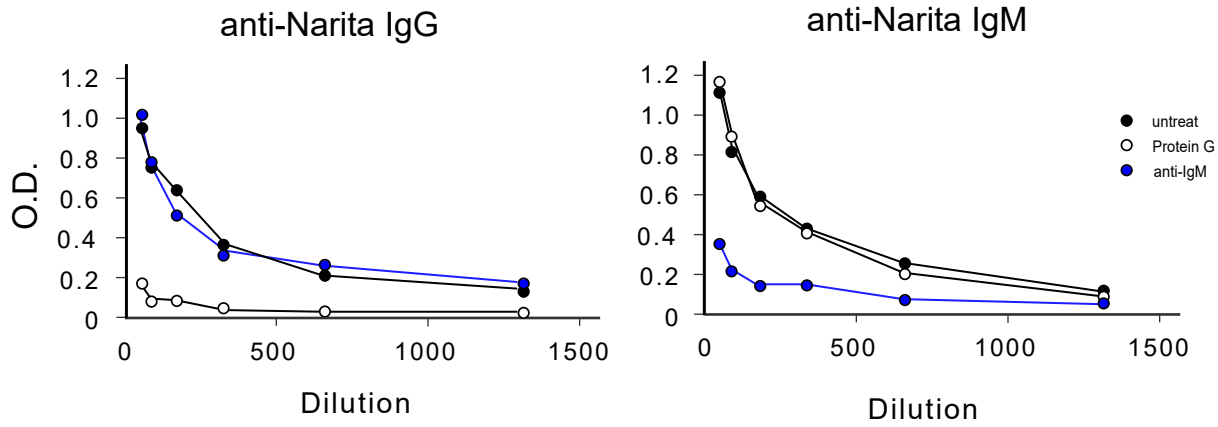

### Supplementary Fig. 2 Depletion of IgG or IgM antibodies from BALF

BALF was passed through Protein-G (white) or anti-mouse IgM antibody (blue) conjugated Sepharose columns. Antibodies specific for Narita-HA were measured by ELISA. Data indicates OD values.

# Supplementary Fig. 3

| Single       |               |            | Dual  |                |            |
|--------------|---------------|------------|-------|----------------|------------|
|              | <i>Igh</i>    | <i>Igk</i> |       | <i>Igh</i>     | <i>Igk</i> |
| SP66         | V1-15 D2-3 J3 | V4-59 J5   | DP13  | V1-19 D2-3 J4  | V10-96 J1  |
| SP102        | V1-15 D2-3 J3 | V4-59 J5   | DP11  | V1-26 D1-1 J2  | V8-19 J5   |
| SP132        | V1-15 D2-3 J3 | V4-59 J5   | DP47  | V14-1 D2-2 J2  | V5-43 J2   |
| SP143        | V1-26 D4-1 J2 | V8-30 J5   | DP69  | V1-53 D6-3 J3  | V4-53 J1   |
| SP53         | V1-26 D2-1 J3 | V4-79 J5   | DP76  | V1-64 D1-1 J2  | V6-17 J1   |
| SP72         | V1-34 D1-1 J3 | V4-53 J5   | DP105 | V1-64 D2-2 J1  | V4-79 J5   |
| SP67         | V1-36 D1-1 J1 | V14-111 J2 | DP156 | V1-64 D2-2 J1  | V4-79 J5   |
| SP87         | V1-36 D4-1 J4 | V6-17 J1   | DP98  | V1-72 D2-3 J2  | V8-30 J4   |
| SP77         | V1-50 D4-1 J2 | V14-111 J5 | DP98  | V1-75 D2-1 J2  | V4-53 J5   |
| SP103        | V1-50 D1-1 J1 | V4-72 J5   | DP131 | V1-81 D1-1 J2  | V5-48 J1   |
| SP128        | V1-64 D2-4 J4 | V8-30 J2   |       |                |            |
| SP110        | V1-69 D1-1 J1 | V10-94 J5  |       |                |            |
| SP120        | V1-72 D4-1 J1 | V9-120 J1  |       |                |            |
| SP9          | V1-74 D2-3 J3 | V11-125 J5 |       |                |            |
| SP126        | V1-81 D1-1 J4 | V4-57-1 J4 |       |                |            |
| <b>LAH</b>   |               |            |       |                |            |
| SP109        | V14-1 D2-4 J3 | V4-59 J2   | DP79  | V1-15 D2-3 J3  | V2-109 J2  |
| SP36         | V14-2 D2-3 J1 | V14-100 J5 | DP25  | V14-2 D4-1 J2  | V8-21 J1   |
| SP111        | V14-3 D1-1 J1 | V4-72 J5   | DP7   | V1-50 D1-1 J2  | V8-21 J1   |
| SP70         | V5-12 D2-1 J4 | V10-96 J1  | DP60  | V1-50 D1-1 J2  | V8-21 J1   |
|              |               |            | DP70  | V1-50 D2-5 J3  | V4-52 J2   |
|              |               |            | DP104 | V1-50 D2-14 J1 | V10-94 J5  |
|              |               |            | DP119 | V1-50 D2-14 J1 | V10-94 J5  |
|              |               |            | DP75  | V1-69 D1-1 J1  | V10-94 J5  |
|              |               |            | DP111 | V1-69 D1-1 J1  | V10-94 J5  |
|              |               |            | DP114 | V1-69 D1-1 J1  | V10-94 J5  |
|              |               |            | DP129 | V1-69 D1-1 J1  | V10-94 J5  |
|              |               |            | DP146 | V1-69 D1-1 J1  | V10-94 J5  |
|              |               |            | DP157 | V1-69 D1-1 J1  | V10-94 J5  |
|              |               |            | DP144 | V1-69 D2-5 J3  | V2-109 J2  |
|              |               |            | DP149 | V1-69 D2-5 J3  | V2-109 J2  |
|              |               |            | DP55  | V8-12 D1-1 J2  | V4-72 J5   |
| <b>Stalk</b> |               |            |       |                |            |
|              |               |            | DP14  | V1-76 D2-13 J2 | V6-23 J5   |
|              |               |            | DP44  | V1-76 D2-13 J2 | V6-23 J5   |
|              |               |            | DP41  | V1-81 D2-3 J2  | V12-44 J1  |
|              |               |            | DP134 | V7-3 D2-3 J1   | V6-23 J5   |

## Supplementary Fig. 3 Repertoire usage in single or dual-HA binding B cell clones

The *Igh* and *Igk* repertoires in single or dual-HA binding B cell clones isolated from MLN of A/Narita/1/2009 infected mice are indicated. The blue box indicates the LAH binding clones and the red box indicates the rHA2 binding clones. BCR sequences of HA-specific IgG<sup>+</sup> B cells were obtained by MiSeq and analyzed with the ImMunoGeneTics (IMGT) HighV-QUEST.

## Supplementary Fig. 4

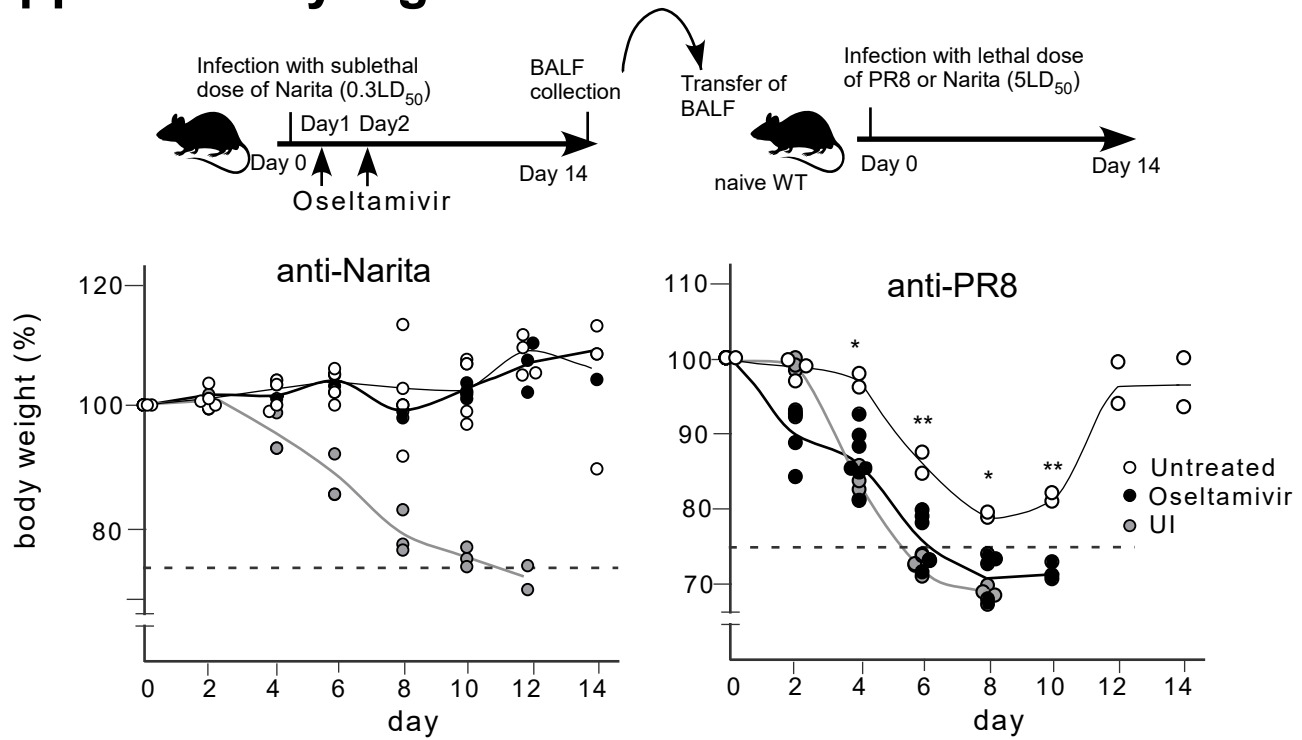

### Supplementary Fig. 4 Lack of antibody responses against a heterotypic virus in oseltamivir treated mice

The top panel indicates the design of the BALF transfer experiment for protective antibodies in oseltamivir treated mice. Mice were intranasally infected with A/Narita/1/2009 ( $0.3LD_{50}$ ) following three days of treatment with 1 mg/head/day of oseltamivir (i.p.). Mice intranasally treated with BALF from mice treated with (black dots) or without (white dots) oseltamivir were challenged intranasally with a lethal dose of A/Narita/1/2009 (left, untreated  $n=5$ , treated  $n=3$ ) or A/PR/8/1934 (right, untreated  $n=2$ , treated  $n=5$ ). The body weight change of mice was monitored until 14 days post-infection. Missing symbols mean that the mice were euthanized, as described in Fig.1. UI represents unimmunized. \* $p<0.05$ , \*\* $p<0.01$  by unpaired, two-tailed  $t$ -test (Untreated group with Osetamivir group).

# Supplementary Fig. 5

Day 10 MLN

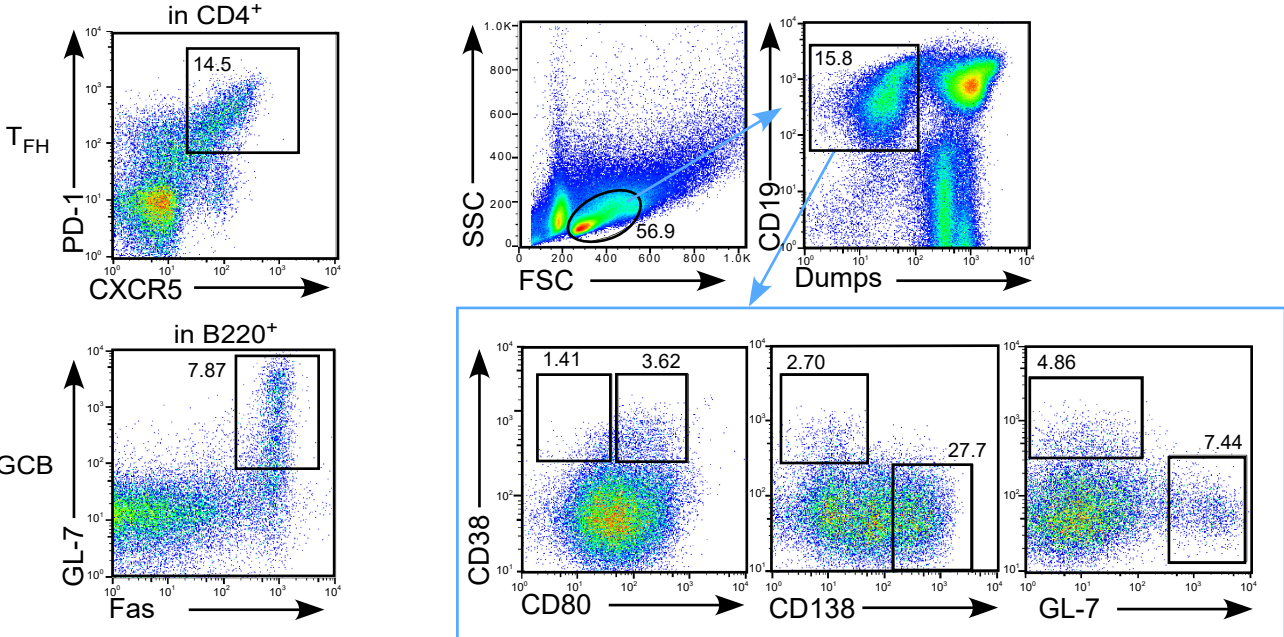

**Supplementary Fig. 5 Memory type HA-binding B cells in the MLN from A/Narita/1/2009 infected mice at 10 days post-infection**

The percentage of T<sub>FH</sub> cells, GC B cells, and memory B cells among B220<sup>+</sup>IgM<sup>-</sup>IgD<sup>-</sup>Dump<sup>-</sup> B cells were analyzed in MLN of mice infected with A/Narita/1/2009 at 10 days post-infection by flow cytometry.

## Supplementary Fig. 6

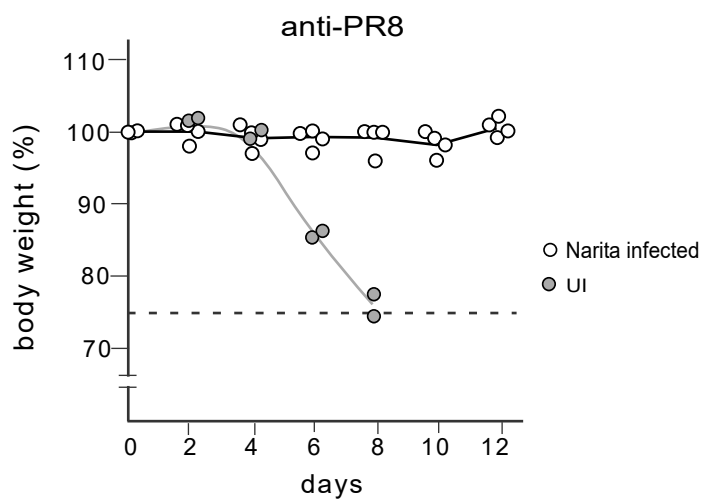

### Supplementary Fig. 6 Memory immune response against heterologous virus infection

Mice immunized by intranasal infection with A/Narita/1/2009 were intranasally challenged with a lethal dose of A/PR/8/1934 (n=4) at 40 days post-immunization. The body weight changes were analyzed in the mice with or without (UI n=2) immunization. Missing symbols mean that the mice were euthanized, as described in Fig.1.

# Supplementary Fig. 7

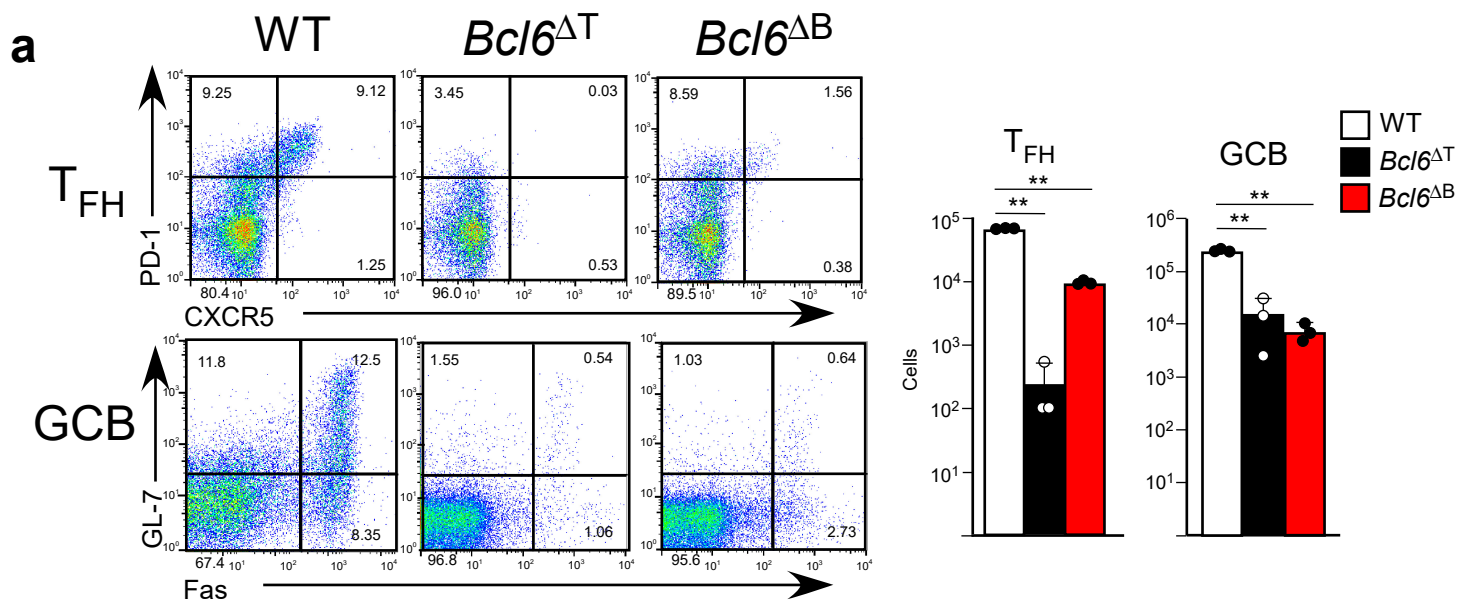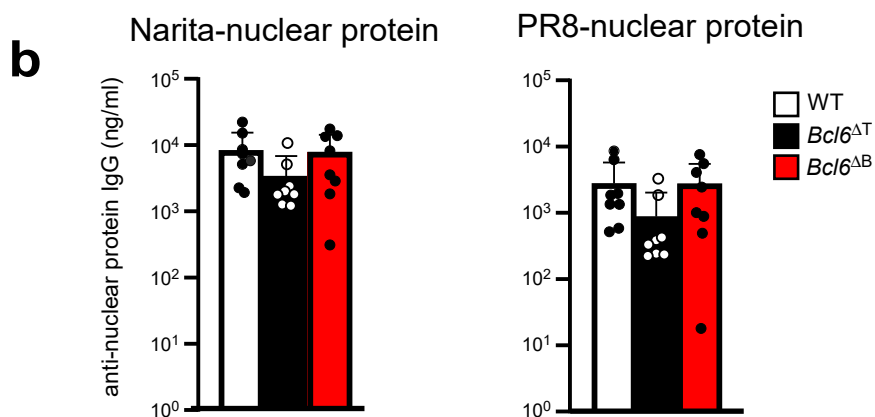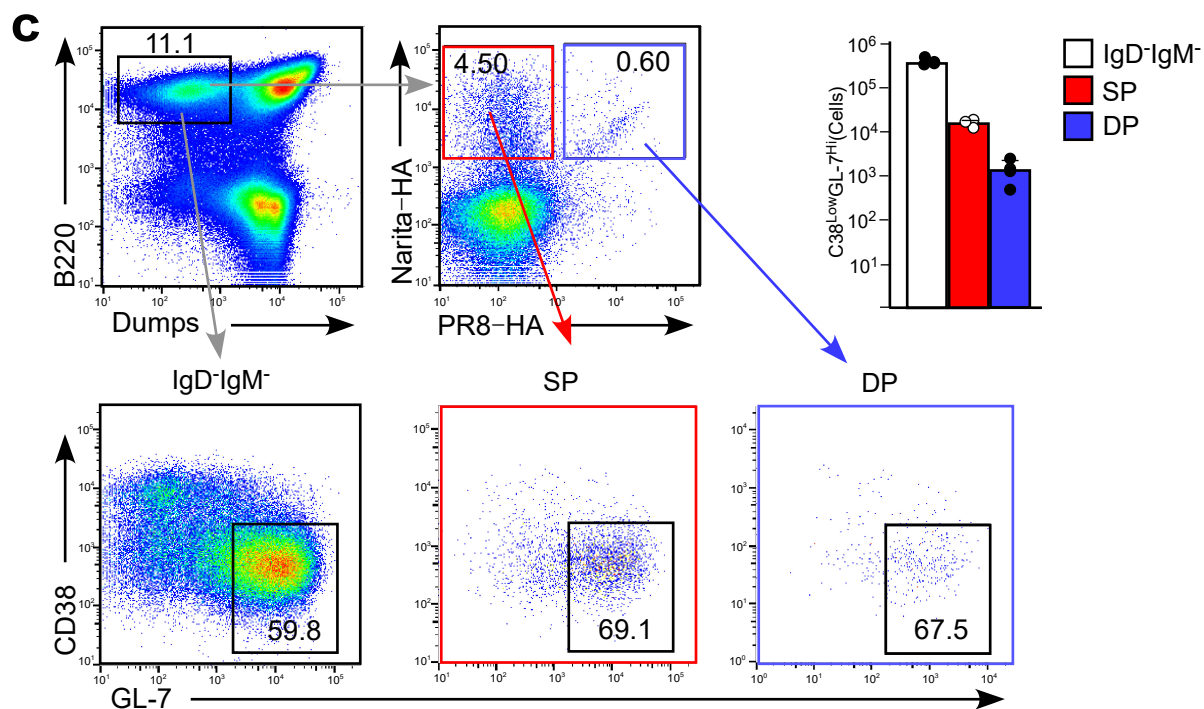

## Supplementary Fig. 7 Effect of *Bcl6* deficiency on $T_{FH}$ cells, GC B cells, and viral anti-nuclear protein-specific IgG responses

**a**, Flow cytometry analysis and percentage of  $T_{FH}$  cells and GC B cells in MLN from WT, *Bcl6*<sup>ΔT</sup>, and *Bcl6*<sup>ΔB</sup> (n=3 for each) mice infected with A/Narita/1/2009 at 14 days post-infection. Cells were gated on CD4<sup>+</sup> (top panels) and B220<sup>+</sup> (bottom panels) cell populations for this analysis. Bars represent mean with s.d. of WT (white), *Bcl6*<sup>ΔT</sup> (Black), and *Bcl6*<sup>ΔB</sup> (red) mice; \*\*p<0.01 by unpaired, two-tailed t-test (WT group with other groups respectively). **b**, Control WT (n=8), *Bcl6*<sup>ΔT</sup> (n=8), and *Bcl6*<sup>ΔB</sup> (n=8) mice were infected with A/Narita/1/2009, and serum IgG titers of anti-Narita- or PR8-nuclear (N) protein were measured by ELISA. **c**, B220<sup>+</sup>IgM<sup>-</sup>IgD<sup>-</sup>Dumps<sup>-</sup> B cells were obtained from MLN of mice infected with A/Narita/1/2009. CD38<sup>low</sup>GL-7<sup>+</sup> GC-B cells were analyzed for binding to Narita-HA or PR8-HA by flow cytometry.

# Supplementary Fig. 8

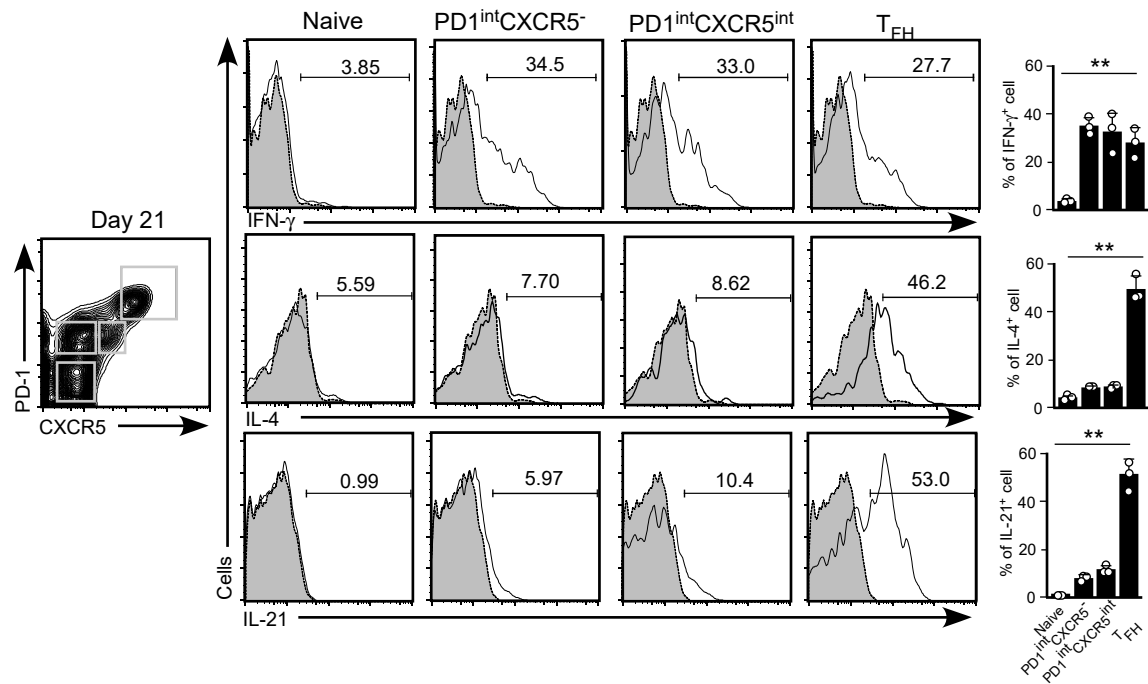

## Supplementary Fig. 8 Cytokine production by T<sub>FH</sub> cells isolated from MLN of A/Narita/1/2009 infected mice

Percentage and Number of IFN- $\gamma$ , IL-4- or IL-21-producing T<sub>FH</sub> cells (CD4<sup>+</sup>PD-1<sup>+</sup> CXCR5<sup>+</sup>) were analyzed in MLN from the IFN- $\gamma$ , IL-4- or IL-21 reporter mice (n=3 each) infected with A/Narita/1/2009 at 14-day post-infection. The percentages of IFN- $\gamma$ , IL-4- or IL-21-producing T<sub>FH</sub> cells were determined by flow cytometry analysis. Cells were gated on the CD4<sup>+</sup> cell population for these analyses. Bars represent mean with s.d.; \*\**p*<0.01 by unpaired, two-tailed *t*-test (Naive group with T<sub>FH</sub> group).



# Supplementary Fig. 9

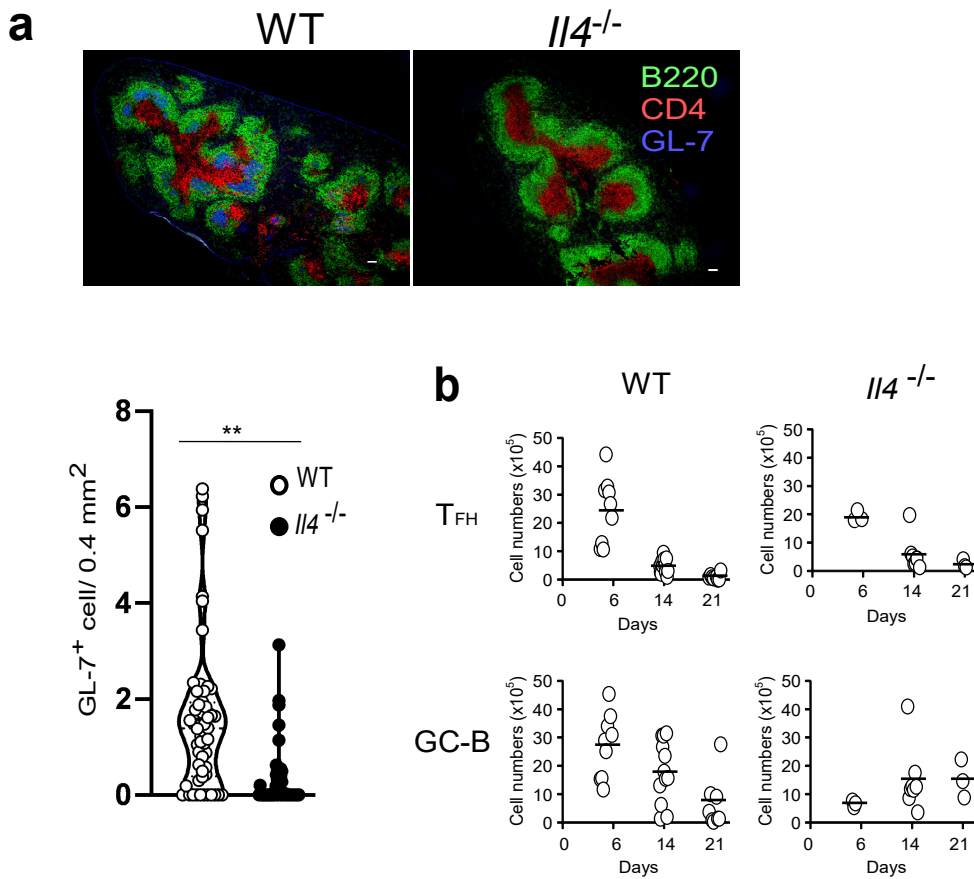

## Supplementary Fig. 9 The role of IL-4 signaling in T<sub>FH</sub> and GC B development

**a**, WT or *Il4*<sup>-/-</sup> naive OT-II CD4<sup>+</sup> T cells were transferred into *Cd28*<sup>-/-</sup> mice followed by the immunization with OVA. Frozen sections were prepared at 7 days post-immunization and stained for B220, GL-7, and CD4 (top). Each dot in the graph represents the number of the GL-7<sup>+</sup> B cells localized in a 0.04 mm<sup>2</sup> square area of a B cell follicle (bottom 46 square areas each). Scale bar indicates 100μm. **b**, The data indicate the number of T<sub>FH</sub> and GC B cells in the spleen from the *Cd28*<sup>-/-</sup> mice transferred with naive CD4<sup>+</sup> T cells from WT or *Il4*<sup>-/-</sup> mice. The analysis was carried out at days 6 (WT n=8, *Il4*<sup>-/-</sup> n=3), 14 (WT n=12, *Il4*<sup>-/-</sup> n=8), 21 (WT n=8, *Il4*<sup>-/-</sup> n=3) post-immunization with OVA. \*\**p*<0.01 by unpaired, two-tailed *t*-test (WT group with *Il4*<sup>-/-</sup> group).

## Supplementary Fig. 10

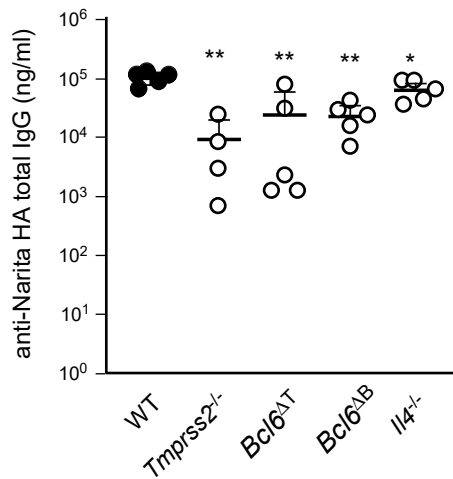

### Supplementary Fig. 10 Total anti- A/Narita/1/2009 HA IgG titers in *Tmprss2*, *Bcl6*, and *Il4* deficient mice

Control WT (n=5), *Tmprss2*<sup>-/-</sup> (n=4), *Bcl6*<sup>ΔT</sup> (n=5), *Bcl6*<sup>ΔB</sup> (n=5), and *Il4*<sup>-/-</sup> (n=5) mice were infected with A/Narita/1/2009 and serum IgG titers for anti-Narita-HA were measured by ELISA. \**p*<0.05, \*\**p*<0.01 by unpaired, two-tailed *t*-test (WT group with other groups respectively).

# Supplementary Fig. 11

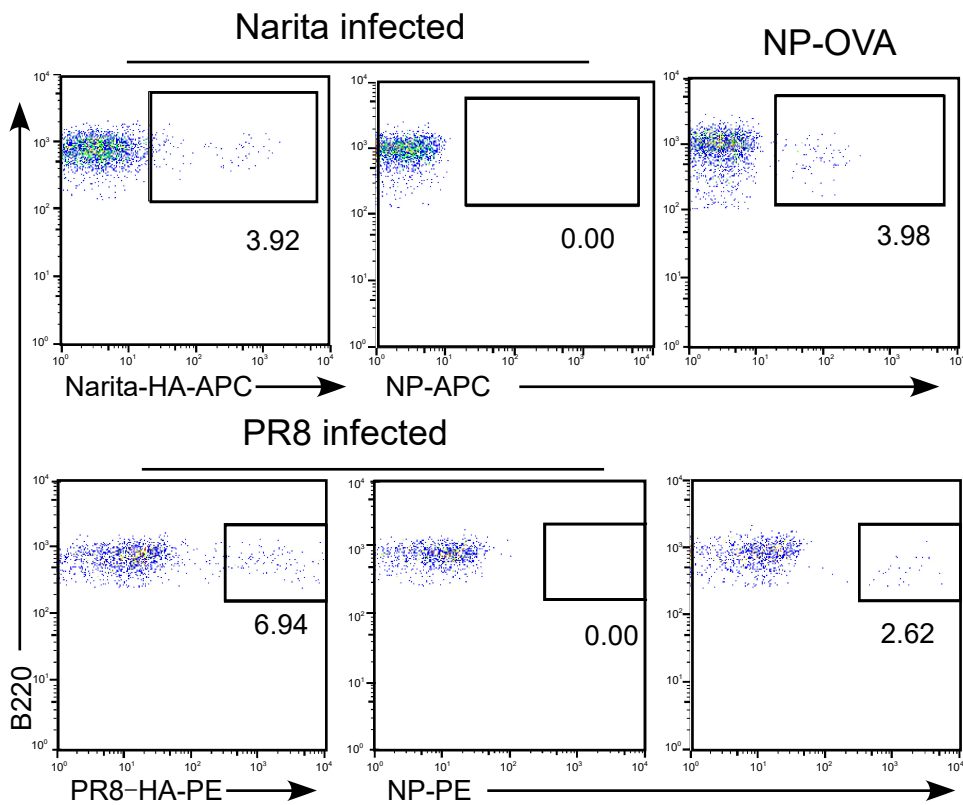

## Supplementary Fig. 11 Verification for the specificity of the HA probes

B220<sup>+</sup>IgM<sup>-</sup>IgD<sup>-</sup>Dump<sup>-</sup> B cells were obtained from mice infected with A/Narita/1/2009 or A/PR/8/1934-HA and from mice immunized with NP<sub>16</sub>-OVA+alum, respectively. Binding to Narita-HA, PR8-HA, or NP<sub>29</sub>-BSA was determined by flow cytometry.

# Supplementary Fig. 12

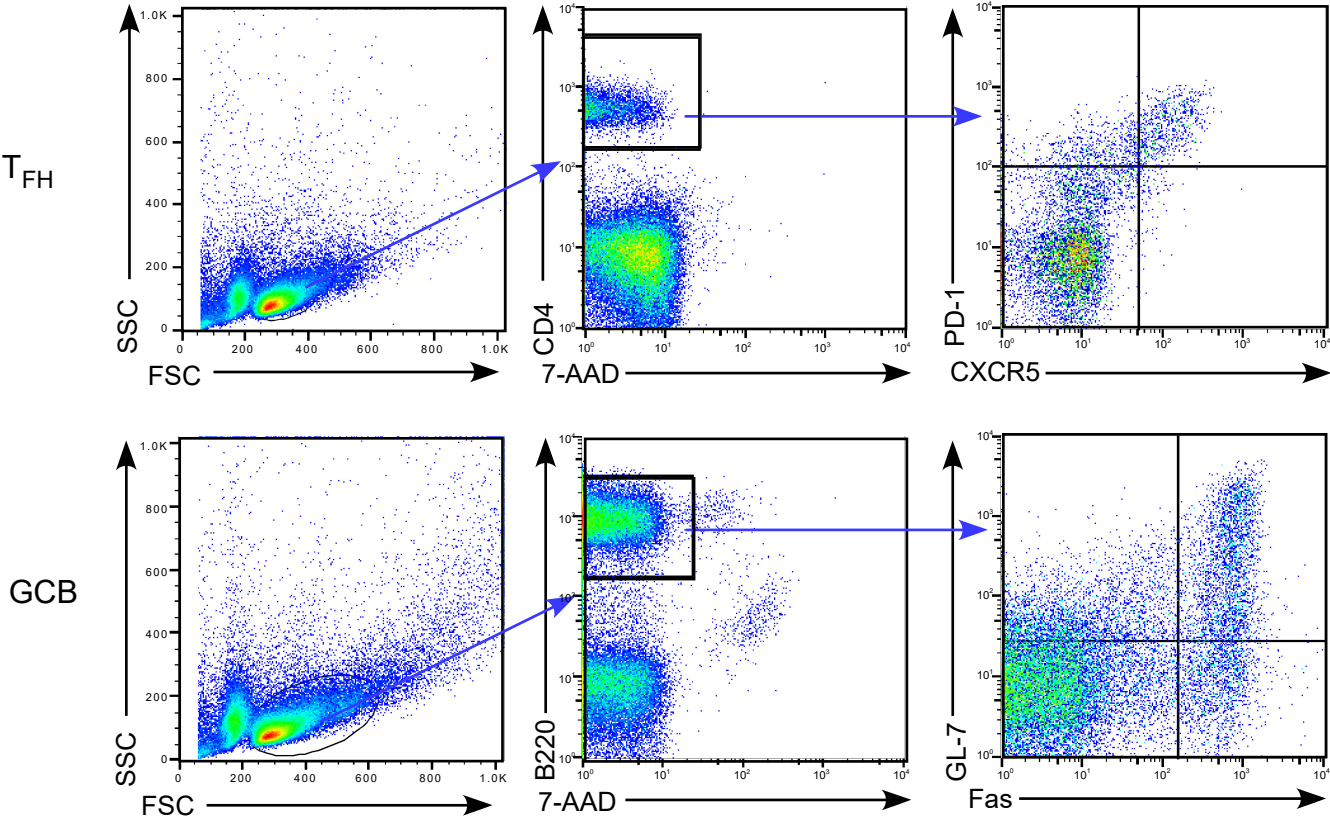

Supplementary Fig. 12 The gating strategy for flow data in Figure 6d, and Supplementary Figure 5, 7a, and 8.

# Supplementary Fig. 13

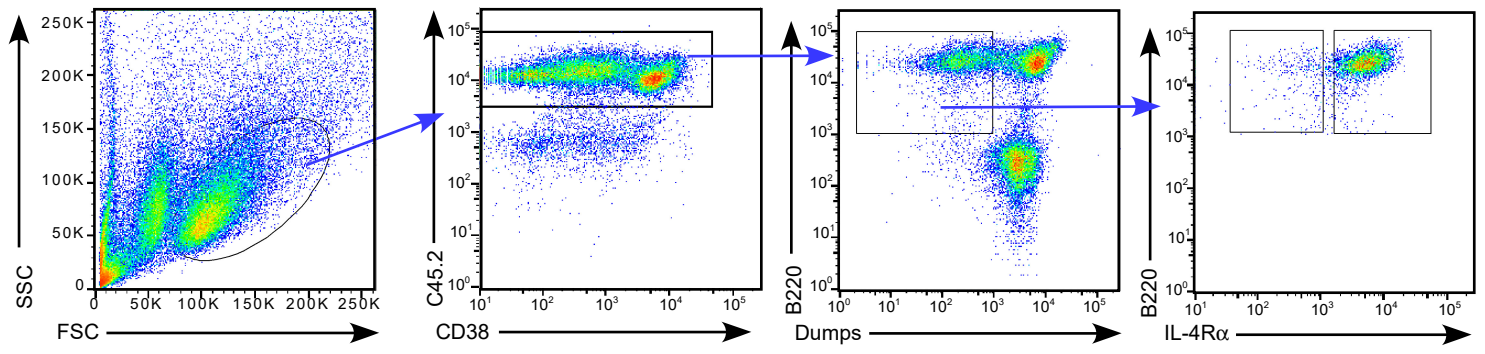

Supplementary Fig. 13 The gating strategy for flow data in Figure 7a.

# Supplementary Table 1

| Primer use                       | Primer name            | Sequence (5'-3')                                                                    |
|----------------------------------|------------------------|-------------------------------------------------------------------------------------|
| KO mice generated by CRISPR-Cas9 | gRNA-F101              | ccaagctttaatacgcactcac                                                              |
|                                  | gRNA-R-XbaI            | cctctagaaaagcaccgactcgggtgccagttgataacg<br>gactagccttattttaacttgctatttctagctctaaaac |
|                                  | gRNA-R101              | cctctagaaaagcaccgactc                                                               |
|                                  | <i>Cxcr3</i>           | ccaagctttaatacgcactcactatagcagccaagccat<br>gtacctgggttttagagctagaaatagcaagt         |
|                                  | <i>Ccr7</i>            | ccaagctttaatacgcactcactatagccccagagcac<br>catggaccggttttagagctagaaatagcaagt         |
| Real-time PCR                    | <i>Actb</i> Forward    | ggatgccacaggattccatac                                                               |
|                                  | <i>Actb</i> Reverse    | actattggcaacgagcggttc-3'                                                            |
|                                  | <i>Aicda</i> Forward   | cggtggaagaggagagatagtg                                                              |
|                                  | <i>Aicda</i> Reverse   | cagtctgagatgtagcgtaggaa                                                             |
|                                  | <i>Bcl2</i> Forward    | gtcccgctcttcaccttcag                                                                |
|                                  | <i>Bcl2</i> Reverse    | gattctgggtgttccccgttg                                                               |
|                                  | <i>Bcl6</i> Forward    | ccggcacgcctagtgatgtt                                                                |
|                                  | <i>Bcl6</i> Reverse    | tgcttatgggctctaaactgct                                                              |
|                                  | <i>Ccnb2</i> Forward   | agctccaaggatcgtcctc                                                                 |
|                                  | <i>Ccnb2</i> Reverse   | tgctctcgttatctatgtcctcg                                                             |
|                                  | <i>Ccnd2</i> Forward   | gagtgggaactggtagtggtg                                                               |
|                                  | <i>Ccnd2</i> Reverse   | cgcacagagcgatgaaggt                                                                 |
|                                  | <i>c-Myb</i> Forward   | gcggttggtctgtattgc                                                                  |
|                                  | <i>c-Myb</i> Reverse   | ttctgtcctcctctctgt                                                                  |
|                                  | <i>c-Myc</i> Forward   | gccagccctgagcccctagt                                                                |
|                                  | <i>c-Myc</i> Reverse   | gggctgtgaggagggttgct                                                                |
|                                  | <i>G6PD</i> Forward    | ccggaaactggctgtgctgct                                                               |
|                                  | <i>G6PD</i> Reverse    | ccaggtcaccgatgcaccc                                                                 |
| <i>Glut</i> Forward              | catccttattgccagggtgtt  |                                                                                     |
| <i>Glut</i> Reverse              | gaagacgacactgagcagcaga |                                                                                     |
| <i>HK2</i> Forward               | tgatcgctgcttattcacgg   |                                                                                     |
| <i>HK2</i> Reverse               | aaccgcctagaaatctccaga  |                                                                                     |
| <i>Irf4</i> Forward              | tccgacagtggtgatcgac    |                                                                                     |
| <i>Irf4</i> Reverse              | cctcacgattgtagtctgctt  |                                                                                     |
| Ig Sequencing                    | Universal Long Primer  | ctaatacgcactcactgtatcaacgcagagt                                                     |
|                                  | Universal Short Primer | ctaatacgcactatagggc                                                                 |
|                                  | mC_G                   | atctccacacacaggggcccagtgataga                                                       |

**Supplementary Table 1 Primers used in this study.**
